# Supplementary material for: The transcription factor Tfcp2l1 promotes primordial germ cell–like cell specification of pluripotent stem cells
Source: PubMed Central journal article supplement — J Biol Chem. 2021 Sep 21;297(4):101217. doi: 10.1016/j.jbc.2021.101217 (PMC8517209; doi:10.1016/j.jbc.2021.101217), 2021-09-21
Supplement: mmc1.pdf [file mmc1.pdf]

# Supplementary Information

## Figure S1

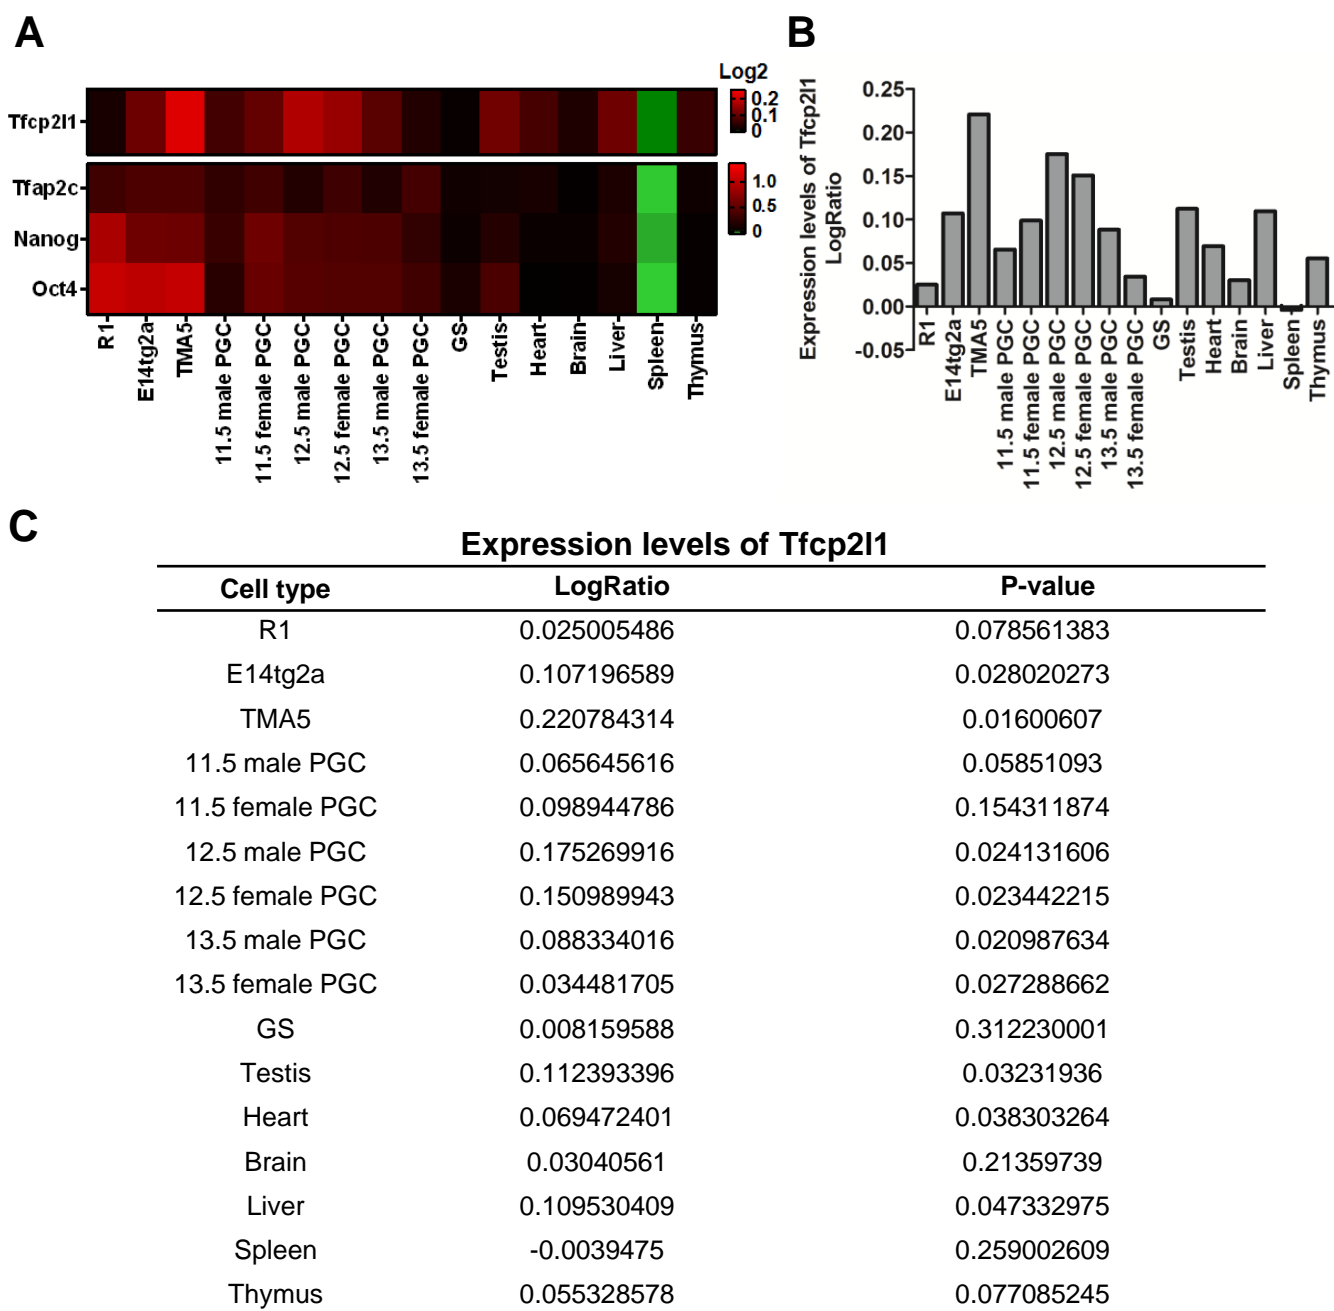

Figure S1. Tfc2p211 expression in different tissue samples

A. Heatmap showing the expression of Tfc2p211, Tfc2p2c, Nanog and Oct4 in mouse ESCs, PGCs and different adult tissues. R1, E14tg2a and TMA5 are mouse ESC lines.

B and C. Quantification of Tfc2p211 expression in mouse ESCs, PGCs and different adult tissues.



**Figure S3**

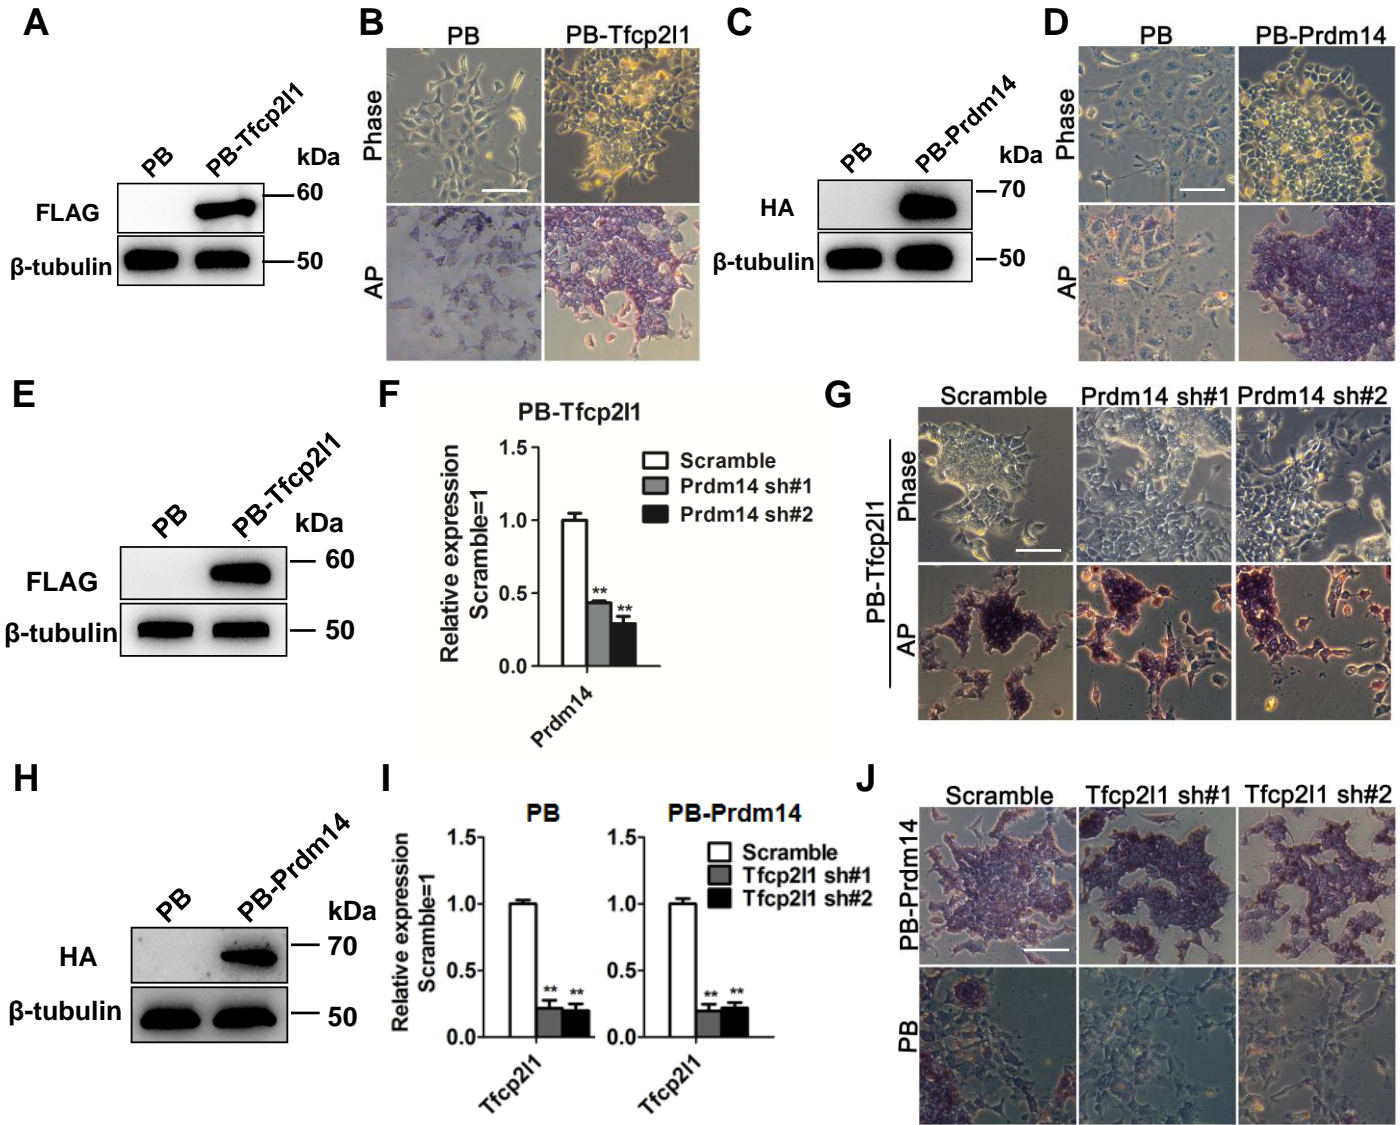

Figure S3. Tfcp2l1 promotes mouse ESC self-renewal partially through Prdm14 induction

- (A) Western blot analysis of FLAG in 46C mouse ESCs overexpressing empty vector (PB) or FLAG-tagged Tfcp2l1 (PB-Tfcp2l1).
- (B) Phase contrast images and AP staining of PB and PB-Tfcp2l1 mouse ESCs cultured in serum containing medium without LIF for 7 days. Bar, 100  $\mu$ m.
- (C) Western blot analysis of HA in 46C mouse ESCs overexpressing PB or the HA-tagged Prdm14 gene.
- (D) Phase contrast images and AP staining of PB and PB-Prdm14 mouse ESCs cultured in serum medium in the absence of LIF for 7 days. Bar, 100  $\mu$ m.
- (E) Western blot analysis of FLAG in PB and PB-Tfcp2l1 mouse ESCs.
- (F) qRT-PCR analysis of Prdm14 in PB-Tfcp2l1 mouse ESCs infected with Scramble or mouse Prdm14 shRNA lentiviruses (Prdm14 sh#1, Prdm14 sh#2). Data are the mean  $\pm$  s.d. (three independent experiments). \*\*P<0.01 versus Scramble.
- (G) Phenotypic and AP staining of Scramble control and Prdm14 shRNA mESCs overexpressing PB-Tfcp2l1 and cultured in serum-containing condition without LIF for 7 days. Bar, 100  $\mu$ m.
- (H) Western blot analysis of HA in PB and PB-Prdm14 in 46C mouse ESCs.
- (I) qRT-PCR analysis of Tfcp2l1 in PB and PB-Prdm14 mouse ESCs infected with Scramble or mouse Tfcp2l1 shRNA lentiviruses (Tfcp2l1 sh#1, Tfcp2l1 sh#2). Data are the mean  $\pm$  s.d. (three independent experiments). \*\*P<0.01 versus Scramble.
- (J) AP staining of PB and PB-Prdm14 mouse ESCs infected with Scramble or Tfcp2l1 shRNA lentiviruses, and cultured in serum-containing medium without LIF for 7 days. Bar, 100  $\mu$ m.

Figure S4

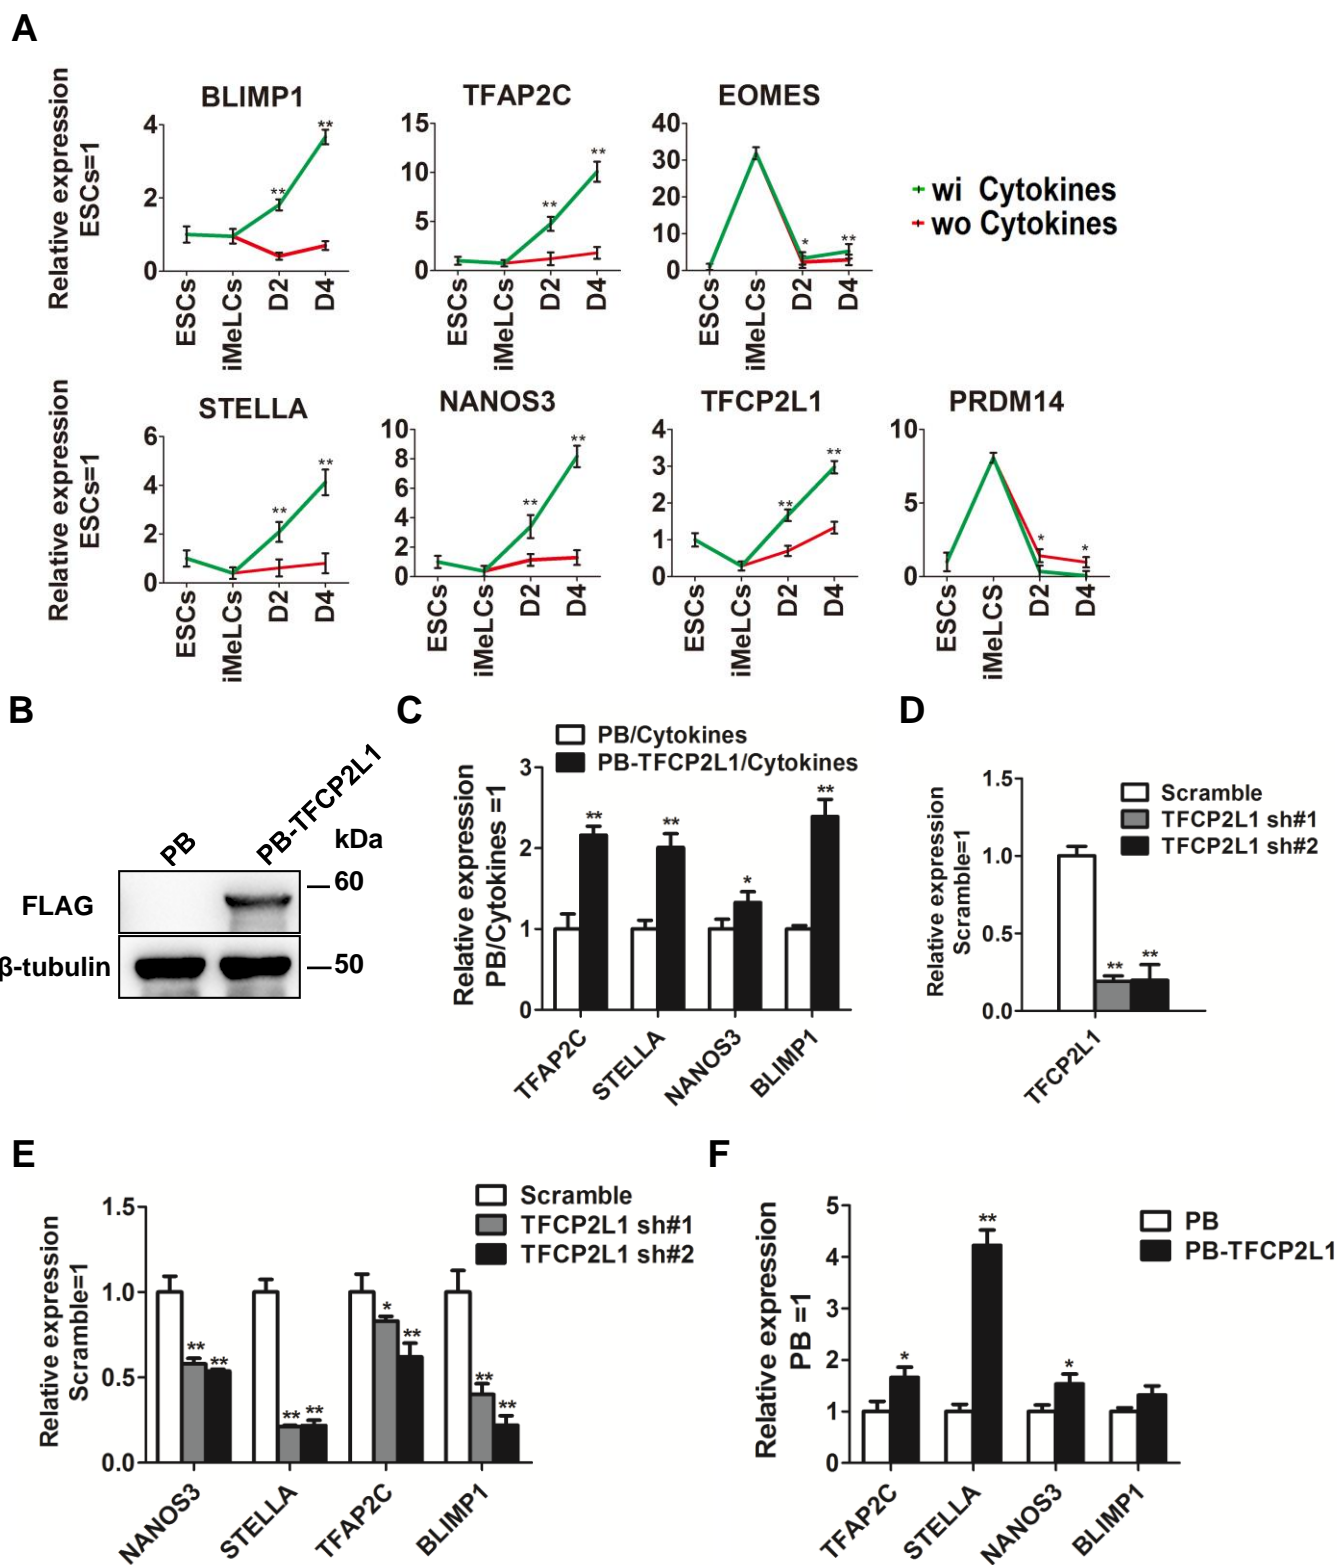

Figure S4. Tfc2l1 favors human PGCLC specification in H9 ESCs

- (A) qRT-PCR analysis of the expression levels of TF2L1 and PGC markers during human PGCLC generation from H9 human ESCs. Data are the mean±s.d. (three independent experiments). \*P<0.05, \*\*P<0.01 versus wo Cytokines.
- (B) Western blot analysis of FLAG in human ESCs overexpressing empty vector (PB) and FLAG-tagged human TF2L1 gene (PB-TF2L1).
- (C) qRT-PCR analysis of the expression levels of PGC genes in PB and PB-TF2L1 human ESCs exposed to cytokines, including BMP2, LIF, SCF and EGF, for 4 days. Data are the mean±s.d. (three independent experiments). \*P<0.05, \*\*P<0.01 versus PB/Cytokines.
- (D) qRT-PCR analysis of human TF2L1 expression in H9 cells infected with Scramble or TF2L1 shRNA lentiviruses. Data are mean±s.d. (N=3 biological replicates). \*\*P<0.01 versus Scramble.
- (E) qRT-PCR analysis of the PGC markers in H9 cells infected with Scramble or human TF2L1 shRNA lentiviruses and induced into PGCLCs under PGCLC-inductive cytokines for 4 days. Data are the mean±s.d. (N=3 biological replicates). \*P<0.05, \*\*P<0.01 versus Scramble.
- (F) qRT-PCR analysis of the expression levels of PGC genes in PB and PB-TF2L1 in H9 cells transformed into iMeLCs and then cultured in GK15 medium for 4 days. Data are the mean±s.d. (N=3 biological replicates). \*P<0.05, \*\*P<0.01 versus PB.

**Table S1. Primer sequence for gene overexpression experiment**

| Symbol              | Forward sequence (5'-3')               | Reverse sequence (5'-3')               |
|---------------------|----------------------------------------|----------------------------------------|
| <b>Mus musculus</b> |                                        |                                        |
| Tfcp2l1             | CGGGATCCATGCTGTTCTGGCAC<br>ACGCAG      | CCGCTCGAGTCAGAGTCCACAC<br>TTCAGGATGATG |
| Prdm14              | GAAGATCTATGGCCTTACCGCCC<br>TCTGG       | CCGCTCGAGCTAGCAGGTTTTA<br>TGAAGCCTCATG |
| <b>Homo sapiens</b> |                                        |                                        |
| TFCP2L1             | GGATGATCAATGCTCTTCTGGCA<br>CACGCAGCCCG | CCGCTCGAGTCAGAGTCCACAT<br>TTCAGGATGATG |

**Table S2. Primer sequence for gene knockdown experiment**

| Symbol              | Forward sequence (5'-3') |
|---------------------|--------------------------|
| <b>Mus musculus</b> |                          |
| Tfcp2l1 sh#1        | CGGCTCAAGAGAAGGAGAAAT    |
| Tfcp2l1 sh#2        | CGGCTCAAGAGAAGGAGAAAT    |
| Prdm14 sh#1         | ACCTTGAATTACAGGATTAAG    |
| Prdm14 sh#1         | TTAAGTCGTCCCAGTCAATAT    |
| <b>Homo sapiens</b> |                          |
| TFCP2L1 sh#1        | CGAGTCCAGATTGACACGTTT    |
| TFCP2L1 sh#2        | CCGAGATGATTTGGTCCAGAT    |

**Table S3. Primer sequence for qRT-PCR analysis**

| Symbol              | Forward sequence (5'-3')      | Reverse sequence (5'-3') |
|---------------------|-------------------------------|--------------------------|
| <b>Mus musculus</b> |                               |                          |
| Rpl19               | GACGGAAGGGCAGGCATATG          | TGTGGATGTGCTCCATGAGG     |
| Tfcp2l1             | AGGTGCTGACCTCCTGAAGA          | CAGGCTGTTATCCCCACTGT     |
| Prdm14              | AAGCCTTTGCATCTCATGCT          | AGGAAGCCTTTCCCACAAAT     |
| Blimp1              | AGCATGACCTGACATTGACACC        | CTCAACACTCTCATGTAAGAGGC  |
| Tfap2c              | GGGCTTTTCTCTCTTGGCTGGT        | TCCACACGTCACCCACACAA     |
| Stella              | AGGCTCGAAGGAAATGAGTTTG        | TCCTAATTCTTCCCGATTTTCG   |
| Nanos3              | CACTACGGCCTAGGAGCTTGG         | TGATCGCTGACAAGACTGTGG    |
| Nanog               | TACCTCAGCCTCCAGCAGA           | CCTCCAAGTCACTGGCAG       |
| Dnmt3b              | CTCGCAAGGTGTGGGCTTTTGTAAC     | CTGGGCATCTGTCATCTTTGCACC |
| <b>Homo sapiens</b> |                               |                          |
| $\beta$ -ACTIN      | ATAGCAACGTACATGGCTGG          | CACCTTCTACAATGAGCTGC     |
| TFCP2L1             | ATGTGAGGCCAAAGATGACC          | CAGACAGGTTGCTGTCTCCA     |
| BLIMP1              | CGGGGAGAATGTGGACTGGGTAGA<br>G | CTGGAGTTACACTTGGGGGCAGC  |
| TFAP2C              | CGCTCATGTGACTCTCCTGACATCC     | TGGGCCGCCAATAGCATGTTCT   |
| EOMES               | CTGGCTTCCGTGCCACGTC           | CATGCGCCTGCCCTGTTTCG     |
| NANOS3              | CCCGAACTCGGCAGGCAAGA          | AAGGCTCAGACTTCCCGGCAC    |
| STELLA              | ACGCCGATGGACCCATCACAGTTT      | TCTCGGAGGAGATTTGAGAGGCC  |
| PRDM14              | CTACCGAGCCCGAGTGGCCTAC        | TAGAGCCATCCCGGGACCGCA    |
